# Supplementary material for: Measurement of fetal fraction in cell-free DNA from maternal plasma using a panel of insertion/deletion polymorphisms
Source: PLoS One. 2017 Oct 30;12(10):e0186771. doi: 10.1371/journal.pone.0186771 (PMC5662091; doi:10.1371/journal.pone.0186771)
Supplement: S6 Table — The fetal fraction for each informative indel is listed. Estimated fetal fraction is calculated, and the number of informative indels per sample is also shown. (XLSX) [file pone.0186771.s007.xlsx]

## Sheet: Sheet1
	Sample Number
Indel	1	2	3	4	5	6	7	8	9	10	11	12	13	14	15	16	17	18	19	20	21	22	23	24	25	26	27	28	29	30	31	32	33	34	35	36	37	38	39	40	41	42	43	44	45	46	47	48	49
MID187							4.91996											6.30577				7.59726						18.1345							1.9		5.83157									3.65965	10.6433	25.6384
MID2050															6.74789				41.7892								7.85977				7.05412	13.7002		6.11111						24.3413								33.1425
MID2045					2.09723	3.59215									5.506															1.95677	12.391					18.5399								6.34456
MID1372					8.05641																	7.53033																	8.93708					7.90854	2.66197
MID1830																36.3551	12.5389	1.9	3.78876	7.00621	4.35342				2.6								8.94483	2.8			4.30821				26.2351		5.71123		4.21936			23.4008
MID785	10.8929	23.7105		2								4.5						2		33.4					2.3	2.2	8.35634				7.65839	45.3493						4.19023								2.4572			1.7
MID1514					2.83185									1.76282	1.60785						6.82545	1.56671	13.9101	2.88706	10.85	25.1481	5.80618				7.16677				32.1569			9.1416					28.5751	5.29465	3.17754	9.11638	4.09284
MID1643		11.9871		11.9455		3.6947			23.3964			2.9					32.2034		34.7358	40.2									5.02249			13.2877									16.6517	4.18994			5.58077
MID1945	18.0361		29.7		7.81454	2.22314				8.48006	29.1837									31.4445					12.9084		2.2	15.1407					39.6852			8.63931	7.44084	3.79742	8.95716						2.60282				7.01239
MID1782									2.4										39.4398																	3.3		1.5					15.4219		5.2308
MID3031							2.31419																							3.58246	13.2809											15.1735		10.355	5.29412		10.419	43.0252	1.7
MID116											28.8612					18.7841	28.5831												19.5341	5.57792			4.08873							26.5051	12.0499						11.9421	21.9426
MID1209				3.71072									6.1											5.81107					33.1901						4.7554				8.29016			9.72716
MID1384																																				8.29876		2.4		42.7419		13.1062	23.7954
MID520		49.1214	49.5					3.92921	14.4397	28.0605	5.50647			11.2138				18.1818				4.6965			3.3	2.1		9.02004				37.2417		3.55424				5.03876	11.1269					2.17481					5.50459
MID649										13.1683			9.98738					12.2826					7.68139													2.4
MID3220																25.7047	36.174													9.07038			15.3444						7.40891	10.394	20.0148			4.70129
MID3321												2.6				15.7184	22.1648	2.2		4.55259								3.82273					8.26535		20.3896					19.2694	13.3871		13.042
MID1522							1.75485		6.42706		3.66848		16.1		5.23748	40.3039			29.1941		6.27341										9.5393	7.33045		3.99911	11.6505			3.72309		37.3065			20.8787			9.01049
MID257																									4.13458									12.095	11.465				8.87689	5.13678		3.30683
MID1997									9.47998	15.969		2									6.44389		5.45695			16.3344								16.6			1.7						16.4882		10.7314		11.6199	47.805
MID1824										43.5865			6.12475		9.72562		18.5805			10.6496			7.66793						22.1738				14.4272	1.6			2.1		31.2			6.08774		6.40935	1.9913	6.02494			14.851
MID1120								2.4							23.1876	31.7093			30.6106									2.7	43.5402	5.76923					23.4625		1.8		2.7									30.1542
MID2057								2.3						6.39769											11.1036											6.47936	12.5696					14.7193				6.51978			2.2
MID2648												6.79632							2.9			8.38537								8.35792										7.9058				8.4564					16.9164
MID1436																							9.7038		2.7			10.2445								14.7564		4.87805			7.56014						2.93138
MID3097								6.00443					3.6	2.11939							2.32425	7.00013	6.93192							46.7634	8.73396	10.9944														3.97304	2.133
MID1323								2.9																					9.93988											5.22369								2.5
MID1900	11.6708						2.56204				7.57261			4.04235						20.0939			10.0231	16.3785		27.5177	12.8493						48.2534	8.40411	47.9694		13.7892				39.7938			28.6494			16.8171		32.8859
MID2047			36.1									6.59136	14					39.324																		19.9676							36.6718						4.54769
MID1459																								14.9701		1.8		14.7929			22.3012	2.16054	23.2848								16.3721					4.18929		35.0855
MID770																								9.60741		7.29598			32.6801
MID768				6.80792																	3.17797			5.44405		19.926	3.1			1.83958				6.53866	3.3						26.0407							18.6495	8.8
MID1561						9.18129								5.10388			20.8955					1.5716		4.86574			11.5502	2.6	20.9748				12.6331			3.5	3.59322	3.48797	3.66896			16.0634	11.1241
MID1375																24.8807					5.19064						11.8007					7.27041										9.44814				7.62437	10.3716
ZFXZFY					2.33002	3.30165	3.65336								6.17435							6.40449	9.11009	4.32525							6.551	2.06236										14.8774	12.839	9.23828		4.32158	8.82876
Fetal Fraction (%)	13.5333	28.273	38.4333	6.11604	5.20001	4.67282	2.88776	3.50673	11.2286	21.8529	14.9585	4.23128	9.31869	5.10666	8.66873	27.6366	24.4486	11.742	26.0655	21.0495	4.94129	5.47827	8.76788	8.56626	6.23708	12.7903	7.94031	9.55692	23.3819	10.3647	11.0157	17.1668	19.4363	6.8558	17.4499	9.54237	5.90363	4.23968	10.1296	19.8694	19.7895	10.2025	19.0787	8.92156	4.61001	5.84168	8.99669	28.1344	9.6118
Number of informative indels	3	3	3	4	4	4	4	5	5	5	5	6	6	6	6	7	7	7	7	7	7	7	7	7	8	8	8	8	8	8	8	8	9	9	9	9	9	9	9	9	9	9	9	9	9	9	9	10	10
[truncated: 110 more columns]
